# Supplementary material for: Hyperion imaging system reveals heterogeneous tumor microenvironment of oral squamous cell carcinoma patients at T1N0M0 stage
Source: PubMed Central journal article supplement — Ann Transl Med. 2020 Nov;8(22):1513. doi: 10.21037/atm-20-7194 (PMC7729358; doi:10.21037/atm-20-7194), 2020-11
Supplement: atm-08-22-1513-dss.pdf [file atm-08-22-1513-dss.pdf]

## Data Sharing Statement

|                     |                                                                                                                                                     |                                                                                                                           |
|---------------------|-----------------------------------------------------------------------------------------------------------------------------------------------------|---------------------------------------------------------------------------------------------------------------------------|
| <b>Article Info</b> | <a href="http://dx.doi.org/10.21037/atm-20-7194">http://dx.doi.org/10.21037/atm-20-7194</a>                                                         |                                                                                                                           |
| <b>Item</b>         | <b>Question</b>                                                                                                                                     | <b>Authors' Response</b><br>(place "-" if not applicable)                                                                 |
| 1                   | Would you like to share data collected for your study to others?                                                                                    | Yes.                                                                                                                      |
| 2                   | If not, would you like to share the reason for your decision?                                                                                       | -                                                                                                                         |
| 3                   | What data in particular will be shared?                                                                                                             | The detail information of antibodies targeting the OSCC.                                                                  |
| 4                   | Any other documents will be shared? Such as study protocol, statistical analysis plan, informed consent form, clinical study report, analytic code. | The detection and analysis methods of this study will also be shared if requested.                                        |
| 5                   | When will data availability begin?                                                                                                                  | From the publication date.                                                                                                |
| 6                   | When will data availability end?                                                                                                                    | Two years within the publication date, since the technique or survival date may be updated over time.                     |
| 7                   | To whom will you share the data?                                                                                                                    | Surgeons and researchers of head and neck cancer who are interested in studies.                                           |
| 8                   | For what type of analysis or purpose?                                                                                                               | For analyze and explored the tumor metastasis mechanism.                                                                  |
| 9                   | How or where can the data/documents be obtained?                                                                                                    | Emails could be sent to the address below to obtain the shared data: <a href="mailto:c2013xs@163.com">c2013xs@163.com</a> |
| 10                  | Any other restrictions?                                                                                                                             | We may balance the potential benefits and risks for each request and then provide the data that could be shared.          |
